# Supplementary material for: High-Throughput Sequencing Reveals Three Rhabdoviruses Persisting in the IRE/CTVM19 Cell Line
Source: MDPI journal article supplement (doi:10.3390/v16040576), 2024-04-09

Table S1. Oligonucleotide pairs used for the rhabdovirus detection.

| Virus                             | Name              | Sequence                   | Temperature |
|-----------------------------------|-------------------|----------------------------|-------------|
| Chimay rhabdovirus                | Chimay_L_F        | 5'-TCTTGAGCTTTGGTGGTCCG-3' | 55°C        |
|                                   | Chimay_L_R        | 5'-CATCTTGTACACCCGCCCTT-3' |             |
| Norway mononegavirus 1            | Norway_L_F2       | 5'-ACACACTCCATCCTTTTGT-3'  | 50°C        |
|                                   | Norway_L_R2       | 5'-ACTACTCAAGCATCGGAATC-3' |             |
| IRE/CTVM19-associated rhabdovirus | Rhabdo_Miass_L_1F | 5'-GGGTTTGTGGTTAATTTGTC-3' | 50°C        |
|                                   | Rhabdo_Miass_L_1R | 5'-AGTGAGGACTGGATAAAAGA-3' |             |

Figure S1. Passage history of the IRE/CTVM19-associated rhabdovirus strains discussed in the study. Strain used in the current work marked in green.

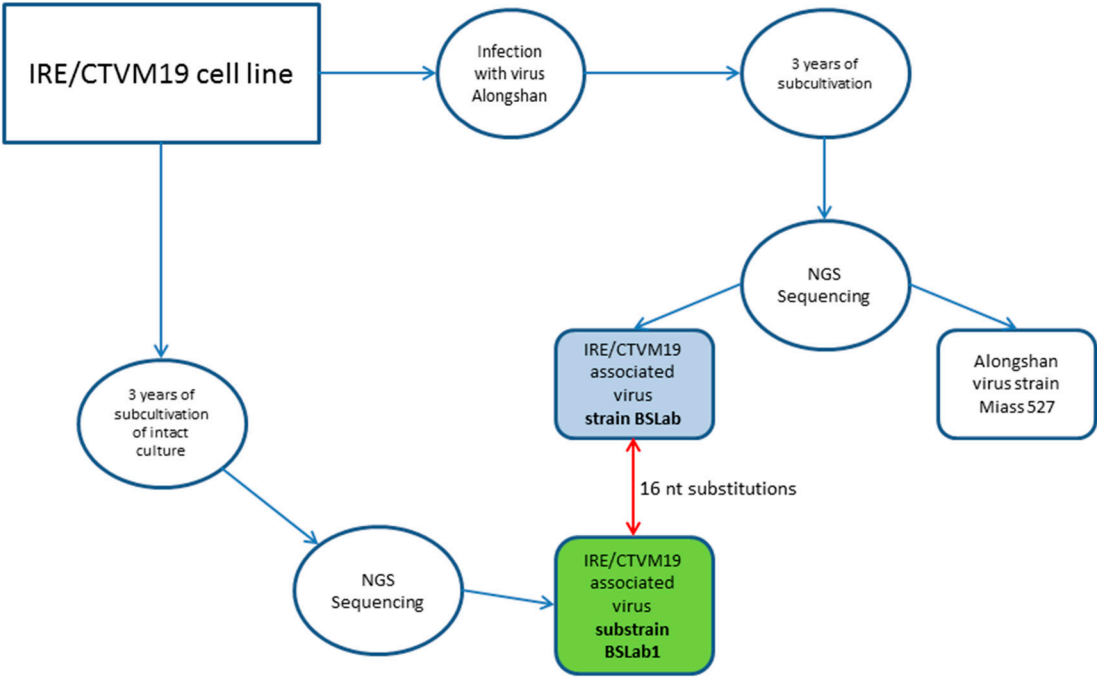

Supplement: s1 [file s1]
